# Supplementary material
Source: publisher figshare collection journal article supplement (https://acs.figshare.com/ndownloader/files/30598729)
Supplement: Supplementary file 1 [file 30598729]

## Supporting Information

### Few-Layer $\text{SrRu}_2\text{O}_6$ Nanosheets as Non-van der Waals Honeycomb Antiferromagnets: Implications for Two-Dimensional Spintronics.

Suvidyakumar Homkar<sup>1</sup>, Bharat Chand<sup>1</sup>, Shatruhan Singh Rajput<sup>1</sup>, Sandeep Gorantla<sup>2</sup>, Tilak Das<sup>3</sup>, Rohit Babar<sup>1</sup>, Shivprasad Patil<sup>1,4</sup>, Ruediger Klingeler<sup>5,6</sup>, Sunil Nair<sup>1,4</sup>, Mukul Kabir<sup>1,4</sup> and Ashna Bajpai<sup>1,4</sup>

1: Department of Physics, Indian Institute of Science Education and Research, Dr. Homi Bhabha Road, Pune 411008, India

2: ŁUKASIEWICZ Research Network – PORT Polish Center for Technology Development, ul. Stabłowicka 147, 54-066 Wrocław, Poland.

3: Dipartimento di Scienza dei Materiali, Università di Milano Bicocca, via R. Cozzi 55, 20125 Milano, Italy

4: Center for Energy Science, Indian Institute of Science Education and Research, Dr. Homi Bhabha Road, Pune 411008, India

5: Kirchhoff Institute of Physics, Heidelberg University, INF 227, 69120 Heidelberg, Germany

6: Centre for Advanced Materials, Heidelberg University, INF 225, 69120 Heidelberg, Germany.

Corresponding author: Ashna Bajpai

E-mail: [ashna@iiserpune.ac.in](mailto:ashna@iiserpune.ac.in)

**Figure S1 :** Magnetization ( M ) as a function of Temperature( T ) from 5K to 300 K ( main panel) for  $\text{SrRu}_2\text{O}_6$  . The inset shows M vs T measured from 300 K -600K, depicting the Neel temperature  $T_N$

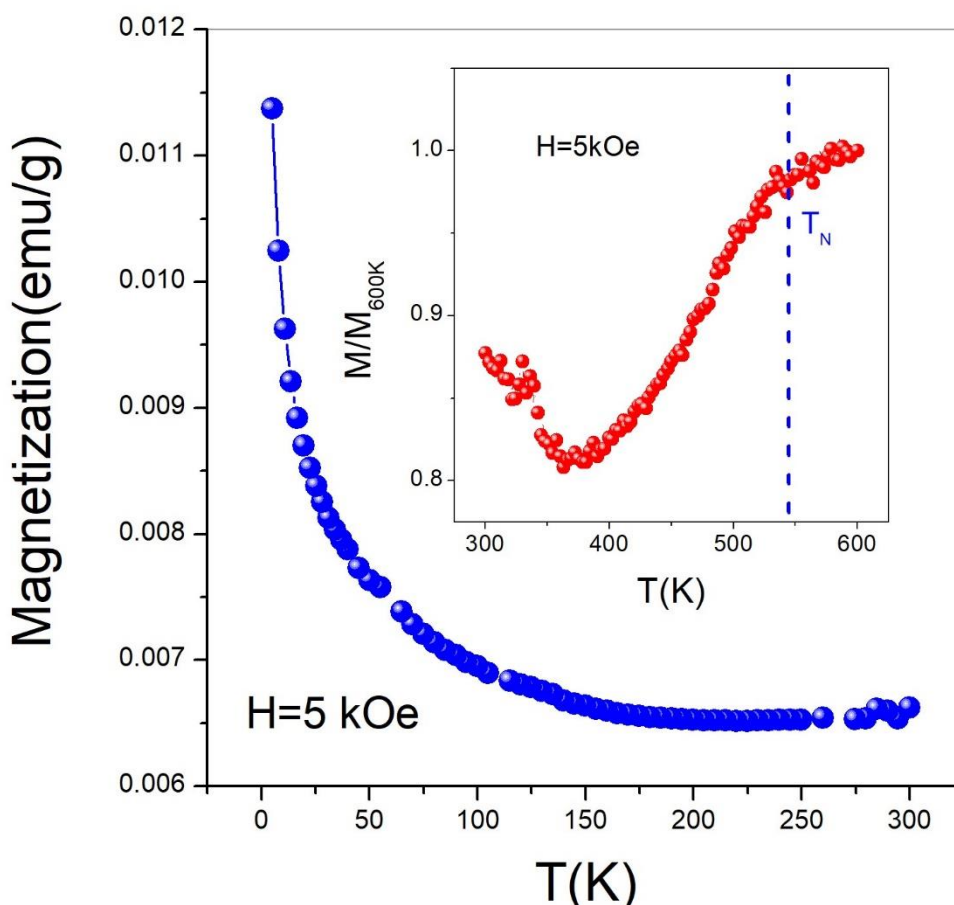

TEM-images S2 – S4 show the measured d-spacing of different spots in the FFT *Figure 4f* using digital micrograph GMS 3.0 software using the spacing/angle tool. TEM image S1, S2 and S3 shows the spots measured in the outer ring, inner ring and central hexagonally arranged spots respectively.

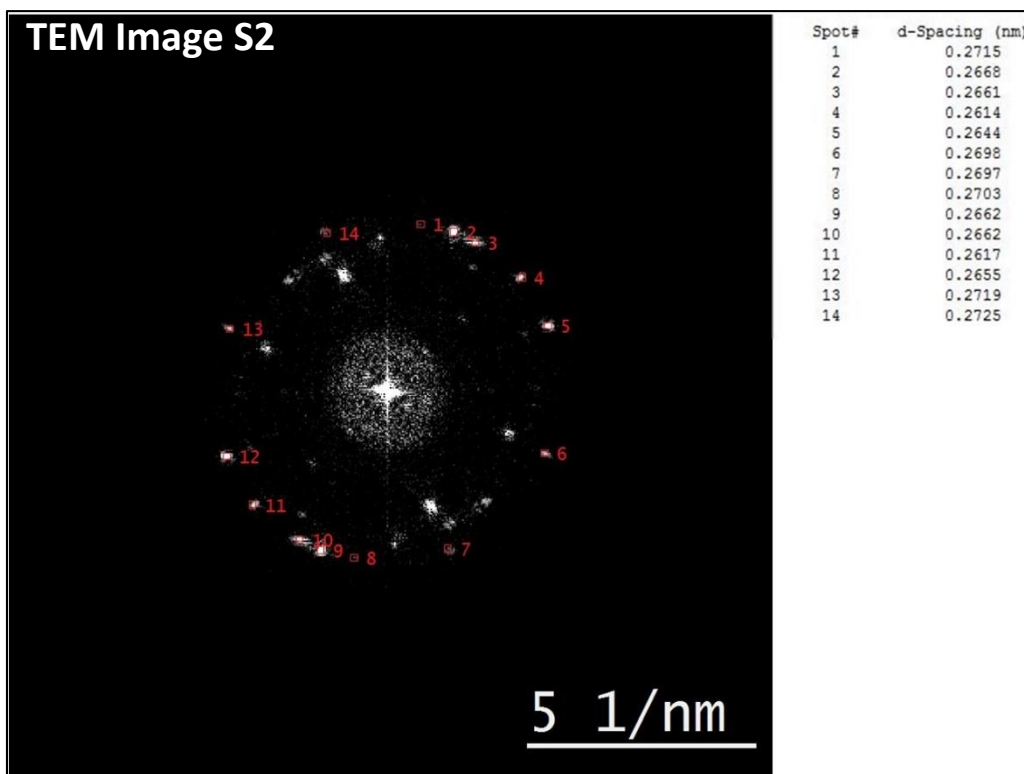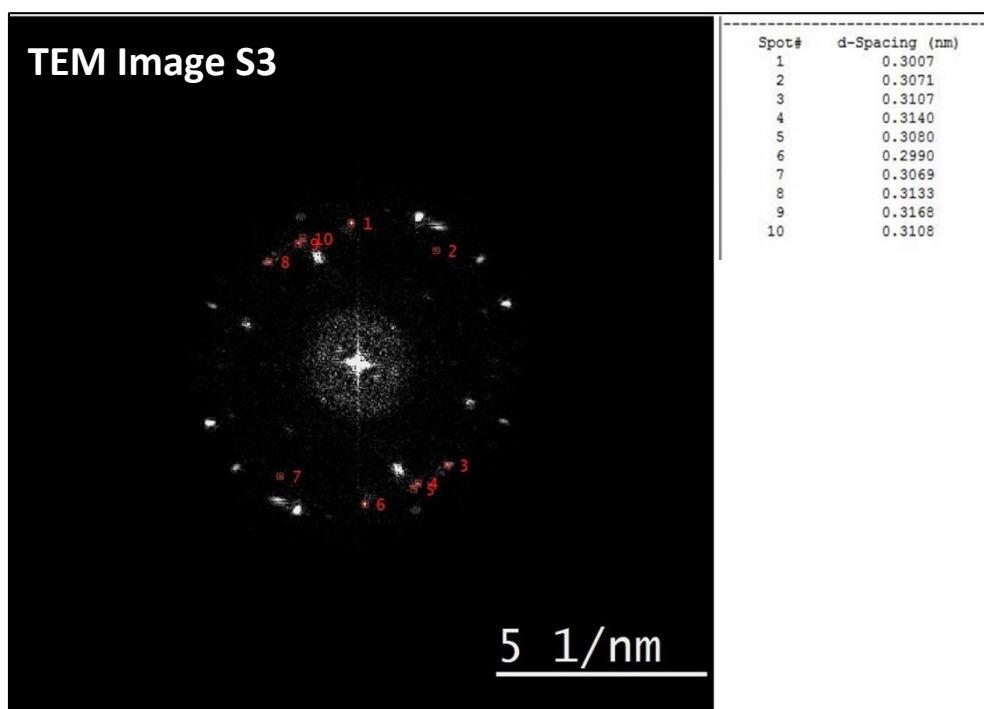

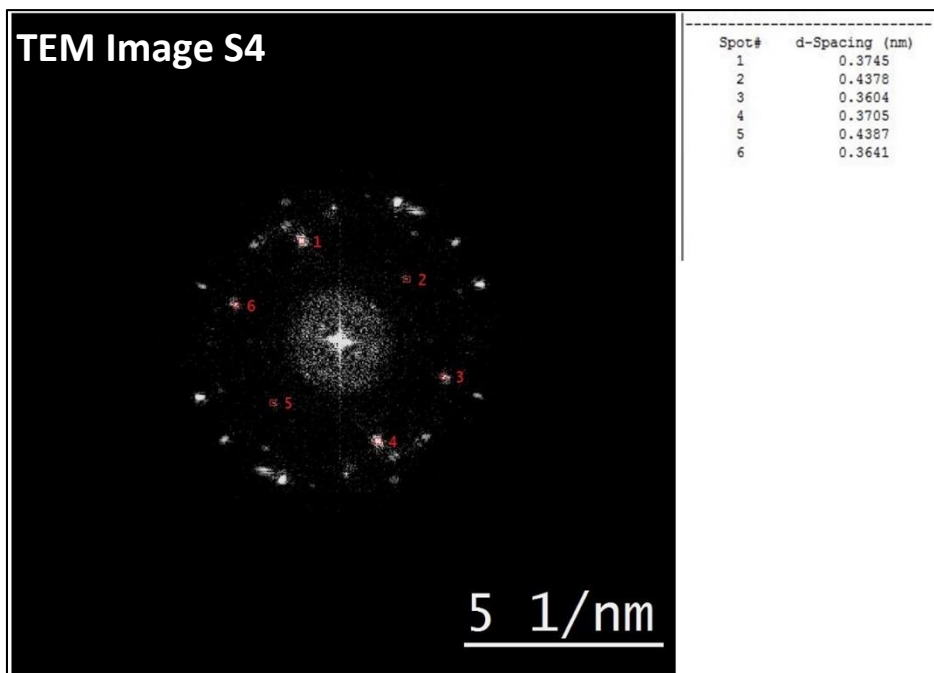

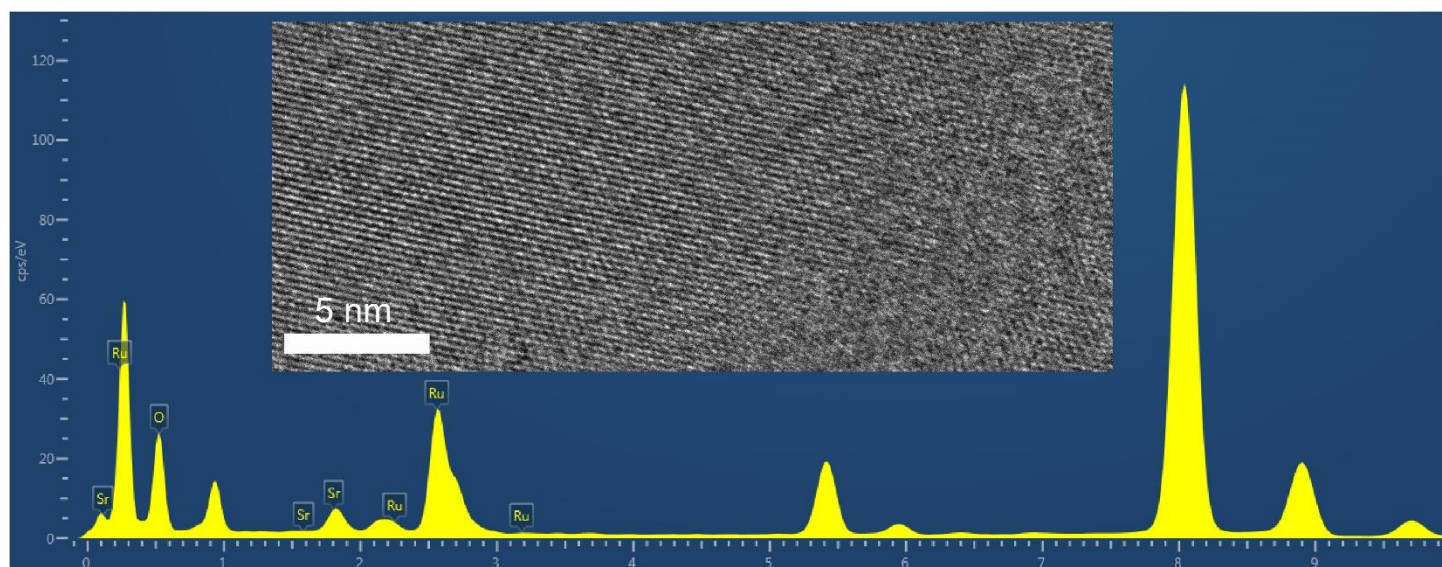

**TEM Image S5 :** The main panel shows presence of Sr, Ru and Oxygen in the exfoliated 2D sheets as observed in EDX measurements. The inset shows the TEM image of the corresponding area.
